# Supplementary material for: Brain size mediates the choice of breeding strategy in the Red-backed shrike Lanius collurio
Source: Research Square preprint supplement (doi:10.21203/rs.3.rs-2495833/v1), 2023-01-31
Supplement: Supplementary file 1 [file 96f5ab169bfd7434a068e10b.docx]

**Supplementary Materials**

Table S1 Model selection table for the first egg laying date, relative illuminance (a proxy for nest concealment), and breeding success, for candidate models differing by delta AICc <2 are presented. The models chosen as the best-describing data are in bold. Variables abbreviations: HVF – scaled female’s head volume, HVM – scaled male’s head volume, Illuminance – scaled relative illuminance, SMM – scaled male’s body condition, SMF – scaled female’s body condition,MayDay – first egg laying date, day after the 1st of May.

| **Candidate model** | | **df** | **logLik** | **AICc** | **delta** | **weight** |
| --- | --- | --- | --- | --- | --- | --- |
| **First egg laying date** | |  |  |  |  |  |
| **GLMM_1** | **HVF** | **3** | **-129.255** | **265.3** | **0.00** | **0.147** |
| GLMM_1a | HVF+HVM | 4 | -128.063 | 265.4 | 0.16 | 0.136 |
| GLMM_1b | HVF+SMF | 4 | -128.481 | 266.3 | 0.99 | 0.089 |
| GLMM_1c | HVF+SMM | 4 | -128.630 | 266.5 | 1.29 | 0.077 |
| GLMM_1d | HVF+HVM+SMF | 5 | -127.342 | 267.5 | 1.43 | 0.072 |
| **Nest concealment** | |  |  |  |  |  |
| **GLMM_2** | **MayDay** | **4** | **69.330** | **-129.1** | **0.00** | **0.207** |
| **Breeding Success** | |  |  |  |  |  |
| GLMM_3a  **GLMM_3** | HVM+lux+SMM+HVM*Illuminance  **HVM+lux+HVM*Illuminance** | 6  **5** | -12.431  **-14.669** | 40.4  **41.7** | 0.00  **1.37** | 0.231  **0.162** |

Table S2 Results of generalized linear mixed-effect candidate models, investigating factors affecting first egg laying date (GLMM_1a, GLMM_1b), and breeding success (GLMM_3a), with delta AICc <2, that were excluded due to insignificant influence of variables. Abbreviations in the brackets correspond to abbreviations in the Table S1.

| Variable | Estimate | SD | p |
| --- | --- | --- | --- |
| GLMM_1a (N=44) |  |  |  |
| Female’s head volume (HVF) | 0.05446 | 0.02823 | 0.000*** |
| Male’s head volume (HVM) | 0.11731 | 0.03020 | 0.053685 |
| GLMM_1b (N=44) |  |  |  |
| Female’s head volume (HVF) | 0.13065 | 0.03015 | 0.000*** |
| Female’s body condition (SMF) | 0.05389 | 0.03291 | 0.0739 |
| GLMM_1c (N=39) |  |  |  |
| Female’s head volume (HVF) | 0.14285 | 0.03568 | 0.000*** |
| Male’s body condition (SMM) | 0.01112 | 0.03874 | 0.774 |
| GLMM_1d (N=41) |  |  |  |
| Female’s head volume (HVF) | 0.13329 | 0.03354 | 0.000*** |
| Female’s body condition (SMF) | 0.05777 | 0.03022 | 0.0559 |
| Male’s head volume (HVM) | 0.05199 | 0.02919 | 0.0749 |
| GLMM_3a (N=39) |  |  |  |
| Male’s head volume (HVM) | 1.2237 | 0.8059 | 0.1289 |
| Relative illuminance (Illuminance) | -3.2622 | 1.3079 | 0.0126 * |
| Male’s body condition (SMM) | -0.5983 | 0.5194 | 0.2494 |
| Male’s head volume (HVM)*  Relative Illuminance (Illuminance) | 3.4089 | 1.3386 | 0.0109 * |

*p<0.05

***p<0.001
